# Supplementary material for: c-MYC-dependent transcriptional inhibition of autophagy is implicated in cisplatin sensitivity in HPV-positive head and neck cancer
Source: PubMed Central journal article supplement (PMC10625625; doi:10.1038/s41419-023-06248-3), 2023-11-04

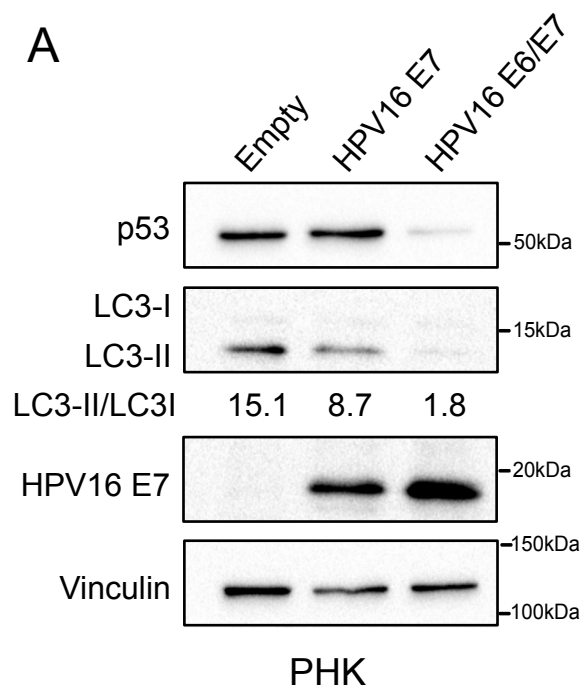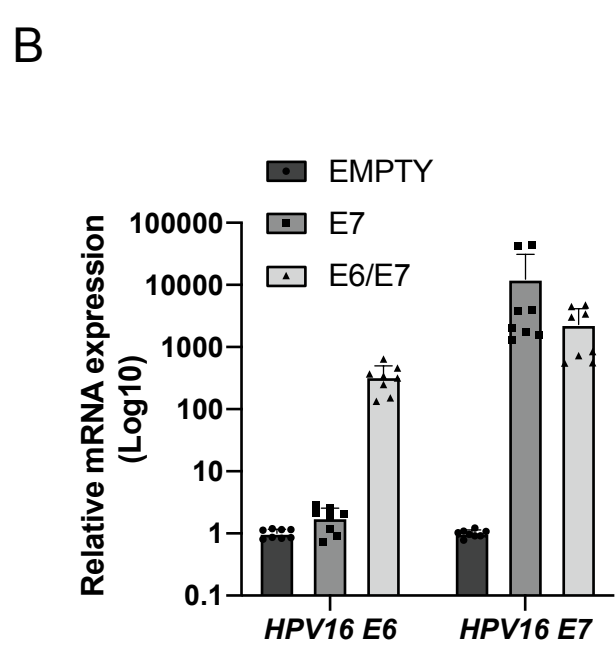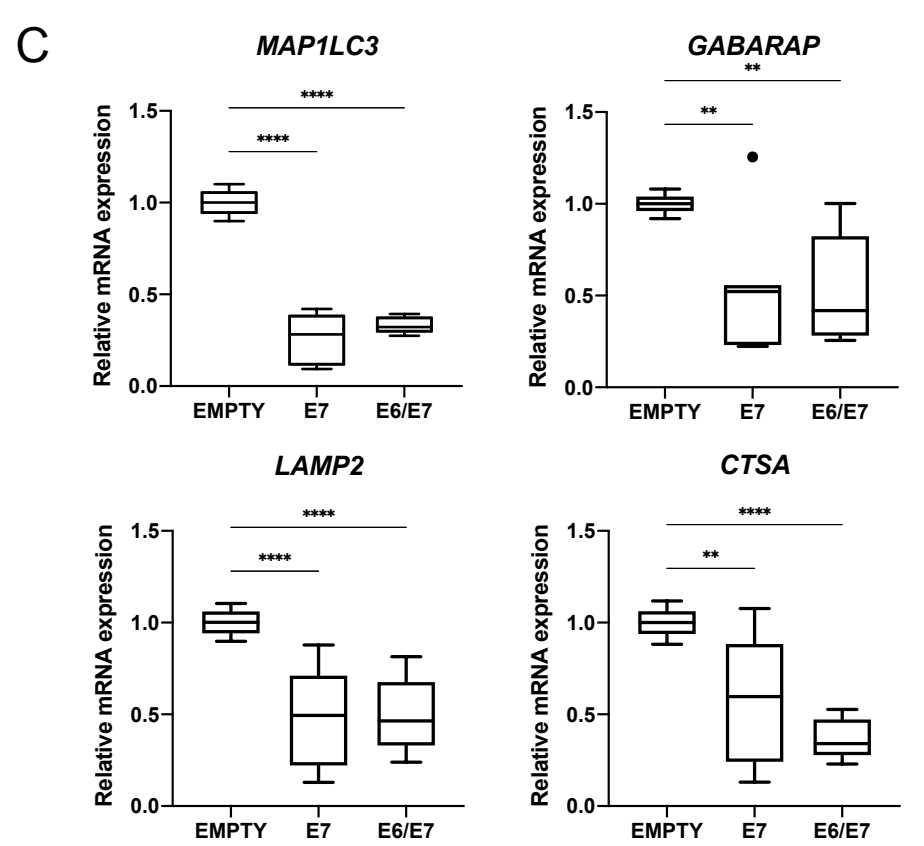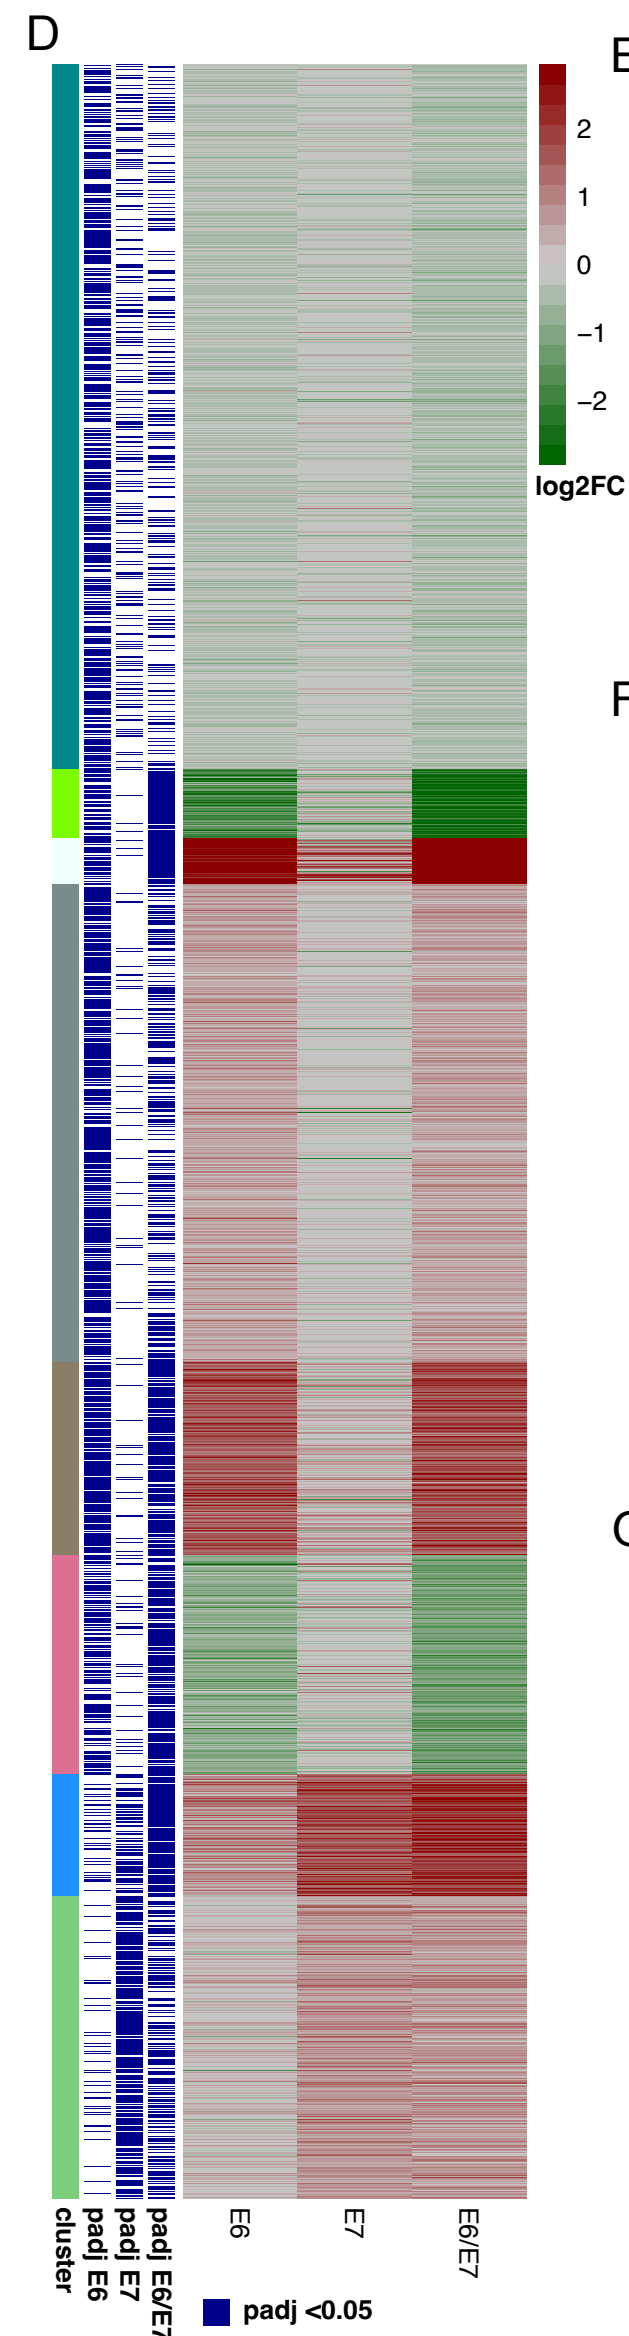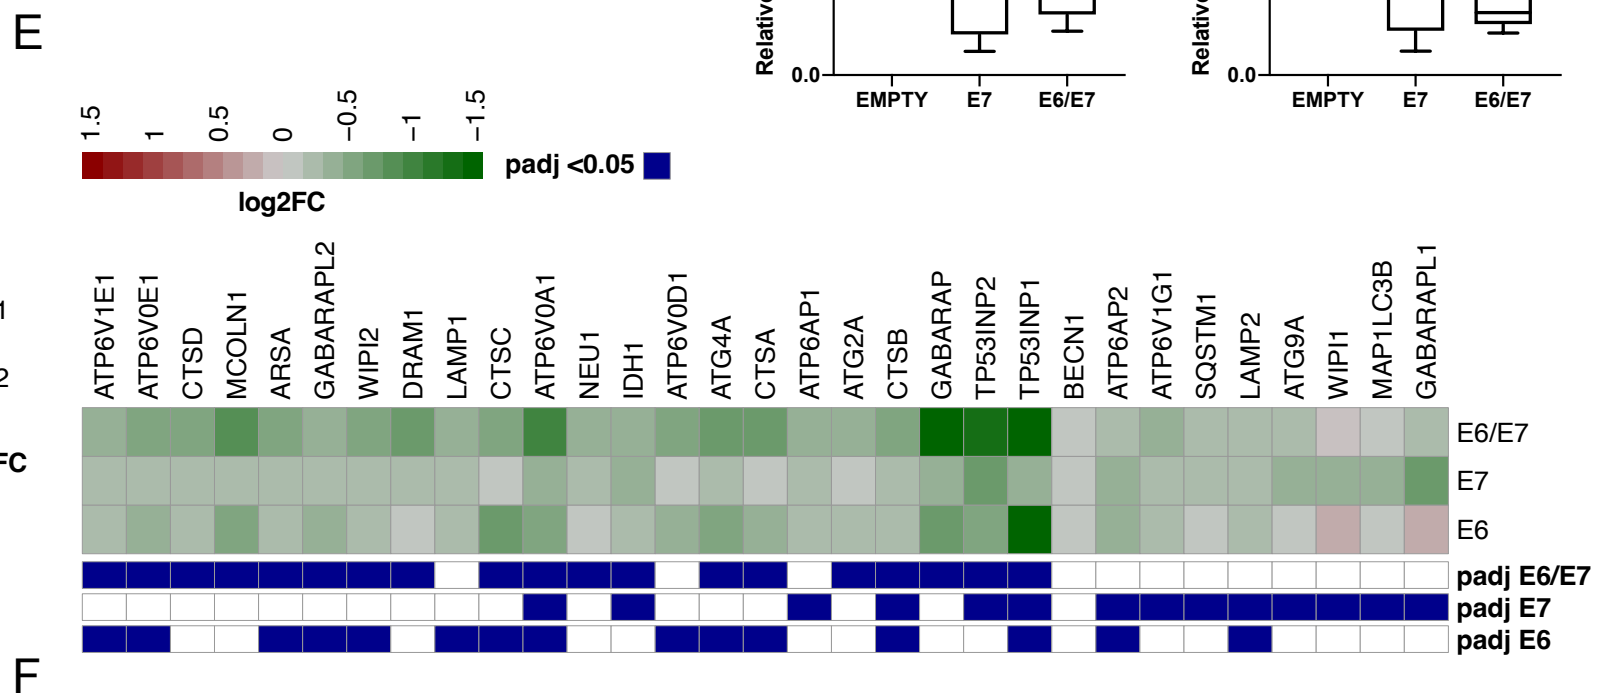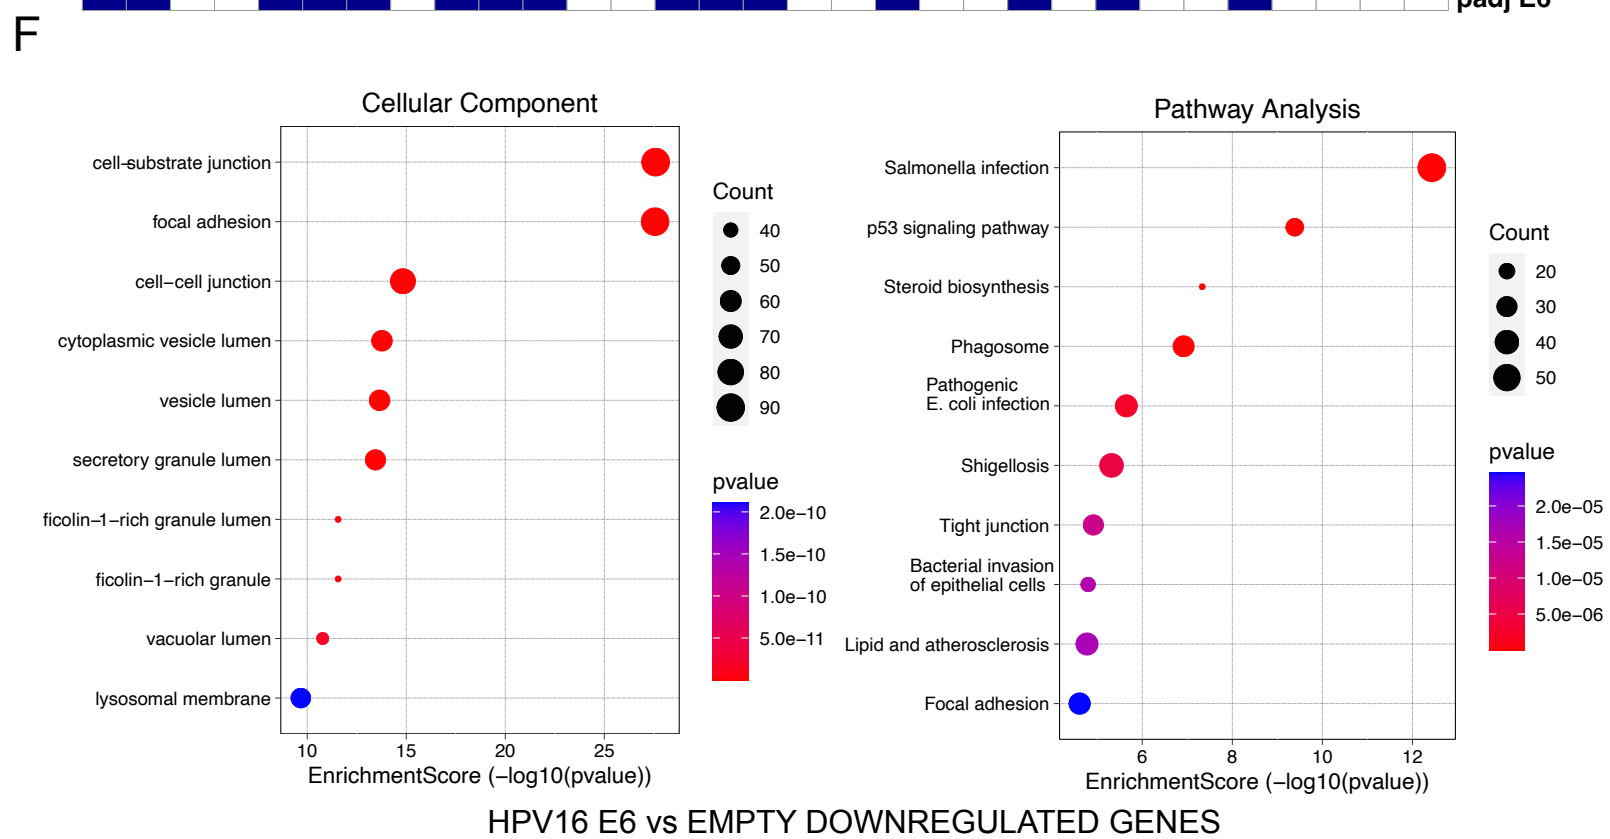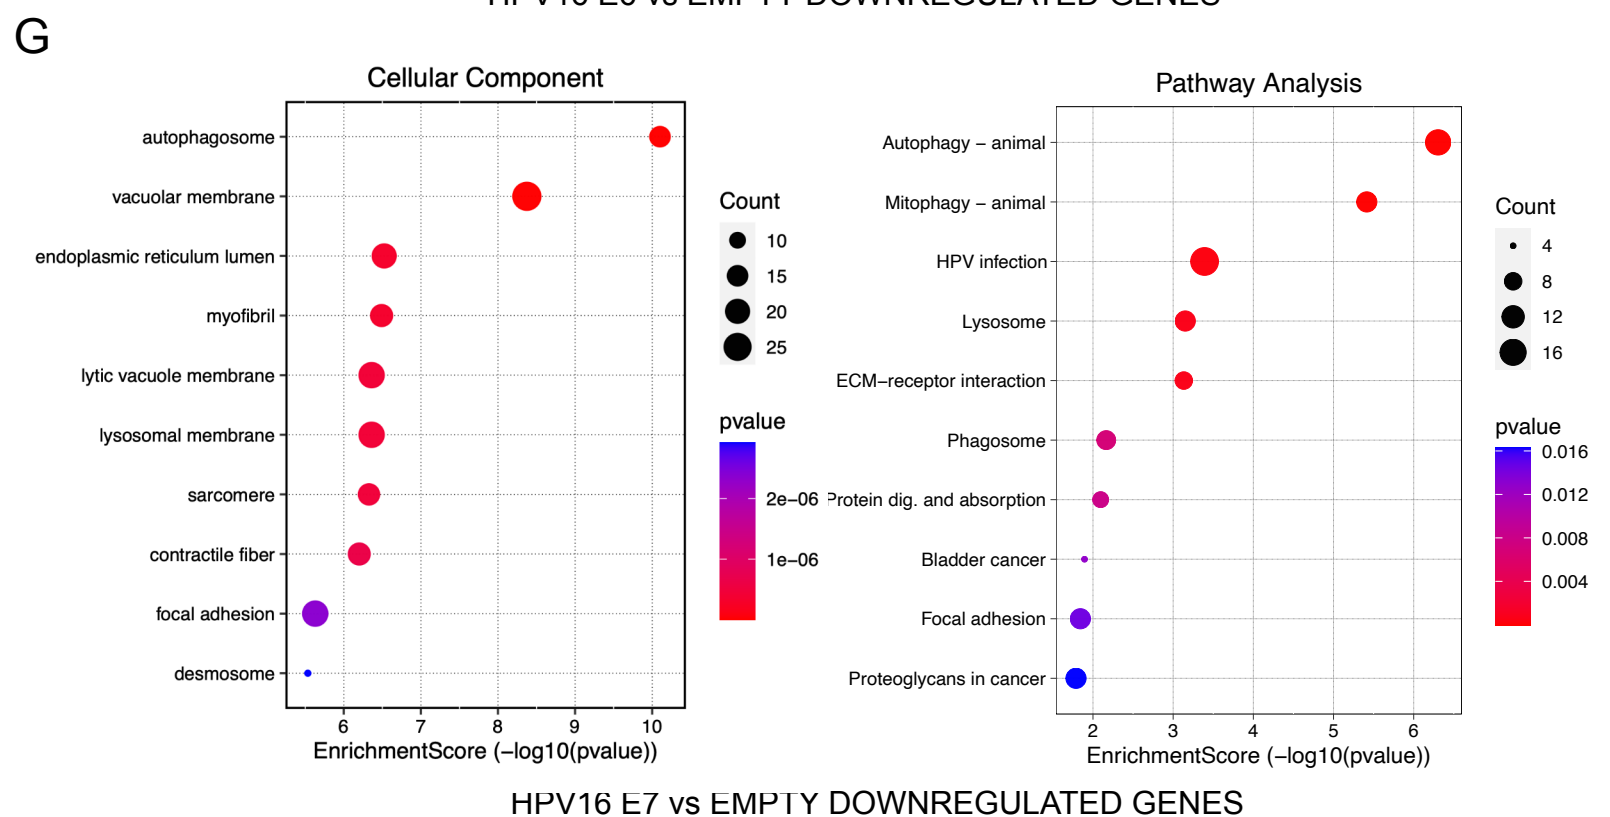

Supplement: 41419_2023_6248_MOESM3_ESM.pdf [file 41419_2023_6248_MOESM3_ESM.pdf]
